# Supplementary material
Source: Springer Nature journal article supplement (https://www.springermedizin.de/resource/supplementary/13069_2013_146_MOESM4_ESM.pdf/9659908)

**A.****Normal homeostasis**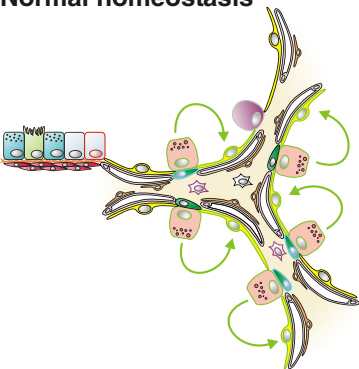**Bleomycin injury**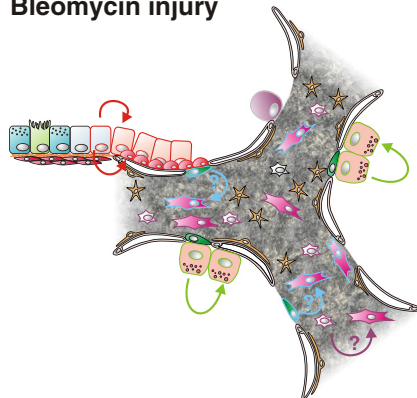**Repairing state**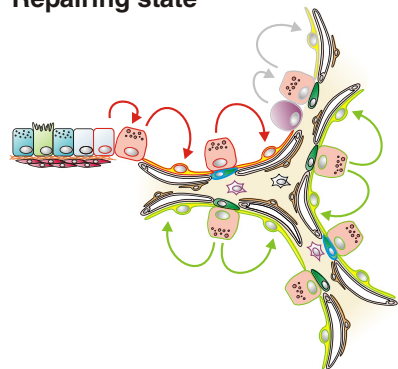**B.****After Bleo/H1N1**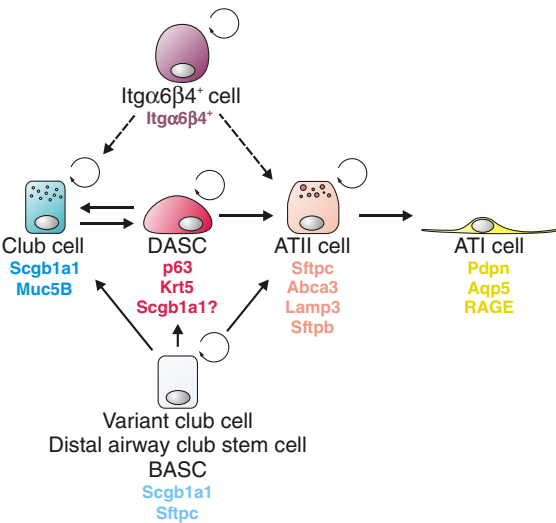**C.**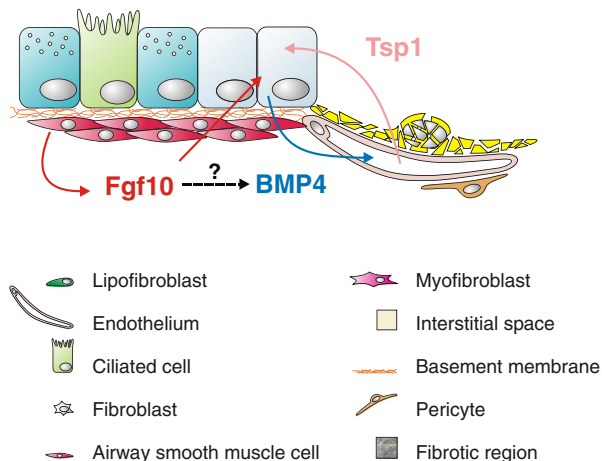

Supplement: MOESM4 [file 9659908]
